# Supplementary material for: Andorra: los paisajes del Románico
Source: MDPI journal article supplement (doi:10.3390/jof10030184), 2009-01-01
Supplement: s1 [file s1]

**Table S1.** Origin of *Pyrenophora teres* f. *teres* isolates and the infection response scores<sup>1</sup> obtained on 20 barley differentials.

| Iso-<br>late                                                                                                                 | Cultivar    | Year | Barley differential |                        |         |         |        |            |       |       |        |         |         |         |         |         |          |         |           |            |        |            |
|------------------------------------------------------------------------------------------------------------------------------|-------------|------|---------------------|------------------------|---------|---------|--------|------------|-------|-------|--------|---------|---------|---------|---------|---------|----------|---------|-----------|------------|--------|------------|
|                                                                                                                              |             |      | Beecher             | Canadian Lake<br>Shore | Corvett | Diamond | Harbin | Manchurian | Prior | Skiff | Tifang | C-20019 | CI 5791 | CI 4207 | CI 9819 | CI 9825 | CI 11458 | Sylphid | Sebastian | Harrington | Botond | MV Initium |
| Karcag, Northern Great Plain of Hungary (Institute for Agricultural Research and Educational Farm of University of Debrecen) |             |      |                     |                        |         |         |        |            |       |       |        |         |         |         |         |         |          |         |           |            |        |            |
| Ka1                                                                                                                          | KG Puszta   | 2017 | 2.25                | 4.85                   | 4.00    | 2.90    | 3.80   | 1.90       | 4.40  | 5.50  | 2.90   | 4.85    | 4.10    | 3.20    | 3.20    | 3.70    | 1.40     | 3.55    | 4.50      | 5.10       | 7.90   | 9.20       |
| Ka2                                                                                                                          | KG Apavár   | 2017 | 1.60                | 1.90                   | 4.80    | 3.10    | 4.65   | 3.00       | 3.90  | 1.10  | 4.00   | 2.15    | 1.25    | 1.50    | 4.10    | 1.60    | 1.25     | 0.90    | 1.70      | 4.80       | 7.50   | 6.60       |
| Ka3                                                                                                                          | KH Tas      | 2017 | 2.35                | 2.15                   | 3.65    | 1.95    | 2.55   | 1.35       | 2.40  | 4.15  | 2.00   | 3.40    | 2.75    | 2.30    | 2.55    | 2.85    | 1.00     | 2.85    | 4.15      | 4.25       | 8.00   | 7.90       |
| Ka4                                                                                                                          | KG Puszta   | 2018 | 5.15                | 5.50                   | 5.20    | 5.50    | 3.75   | 3.90       | 3.00  | 5.70  | 5.35   | 5.50    | 3.00    | 3.70    | 5.00    | 3.10    | 1.80     | 3.00    | 1.90      | 5.20       | 9.60   | 9.90       |
| Ka5                                                                                                                          | KG Konta    | 2018 | 2.65                | 6.45                   | 2.40    | 2.90    | 7.20   | 2.10       | 1.55  | 6.00  | 3.10   | 5.00    | 1.45    | 2.30    | 3.55    | 2.70    | 3.40     | 4.35    | 2.00      | 2.90       | 9.60   | 9.40       |
| Ka6                                                                                                                          | KG Apavár   | 2018 | 4.30                | 9.90                   | 3.70    | 3.80    | 7.65   | 3.00       | 2.60  | 2.35  | 4.20   | 4.65    | 3.30    | 4.30    | 4.75    | 3.90    | 2.80     | 3.65    | 5.20      | 2.20       | 6.75   | 9.50       |
| Ka7                                                                                                                          | KH Tas      | 2018 | 3.70                | 4.60                   | 3.85    | 4.55    | 7.95   | 2.55       | 7.10  | 3.60  | 5.00   | 4.00    | 4.20    | 4.40    | 7.90    | 3.45    | 1.40     | 3.00    | 3.70      | 5.90       | 6.30   | 8.60       |
| Ka8                                                                                                                          | KH Kárpátia | 2018 | 7.10                | 7.00                   | 6.60    | 4.70    | 8.05   | 4.70       | 5.30  | 4.90  | 4.80   | 5.30    | 3.00    | 4.20    | 6.10    | 2.80    | 3.40     | 4.85    | 4.45      | 5.10       | 8.70   | 10.00      |
| Ka9                                                                                                                          | KH Anatólia | 2018 | 4.80                | 1.80                   | 9.40    | 5.30    | 2.00   | 2.20       | 3.20  | 4.10  | 4.60   | 6.20    | 1.80    | 3.40    | 4.30    | 2.00    | 3.40     | 1.90    | 2.80      | 7.40       | 7.50   | 9.70       |
| Ka10                                                                                                                         | KH Rudolf   | 2018 | 3.10                | 6.60                   | 6.30    | 7.60    | 7.45   | 6.15       | 5.00  | 9.00  | 7.40   | 7.25    | 4.65    | 5.00    | 9.50    | 3.30    | 9.60     | 4.65    | 7.00      | 4.50       | 8.90   | 7.90       |
| Ka11                                                                                                                         | Patina      | 2018 | 4.55                | 7.90                   | 7.15    | 4.90    | 9.25   | 5.00       | 7.10  | 4.35  | 4.40   | 5.45    | 5.00    | 3.55    | 8.20    | 4.30    | 3.40     | 4.15    | 4.30      | 5.40       | 9.50   | 9.80       |
| Ka12                                                                                                                         | Boreale     | 2018 | 5.10                | 3.90                   | 5.25    | 3.80    | 3.85   | 3.30       | 7.50  | 4.65  | 3.80   | 4.60    | 4.15    | 3.10    | 7.65    | 3.20    | 2.35     | 3.80    | 4.00      | 4.40       | 8.00   | 7.00       |
| Ka13                                                                                                                         | Boreale     | 2018 | 6.80                | 5.90                   | 4.20    | 7.70    | 6.05   | 5.20       | 8.30  | 4.50  | 6.10   | 7.00    | 6.65    | 5.50    | 6.00    | 6.65    | 7.30     | 5.00    | 6.10      | 6.90       | 9.00   | 8.60       |
| Ka14                                                                                                                         | MV Initium  | 2018 | 7.50                | 5.00                   | 9.60    | 7.00    | 6.10   | 5.50       | 9.75  | 8.70  | 5.90   | 9.85    | 7.20    | 5.10    | 8.70    | 6.60    | 7.85     | 6.75    | 5.15      | 8.40       | 9.20   | 8.90       |
| Ka15                                                                                                                         | GKH 30-15   | 2018 | 4.75                | 4.30                   | 5.00    | 4.15    | 5.95   | 4.20       | 4.00  | 7.20  | 4.55   | 9.65    | 3.90    | 3.60    | 5.25    | 5.10    | 2.45     | 5.15    | 4.15      | 4.10       | 9.60   | 9.50       |
| Ka16                                                                                                                         | Faktor      | 2018 | 7.10                | 7.50                   | 7.25    | 8.40    | 7.55   | 8.00       | 9.15  | 5.15  | 8.10   | 4.75    | 5.60    | 7.50    | 9.20    | 6.00    | 6.85     | 5.00    | 5.00      | 9.45       | 9.60   | 9.40       |
| Kompolt, Northern Hungary (Fleischmann Rudolf Research Institute, Eszterházy Károly University)                              |             |      |                     |                        |         |         |        |            |       |       |        |         |         |         |         |         |          |         |           |            |        |            |
| Ko1                                                                                                                          | MV Initium  | 2017 | 2.30                | 1.20                   | 3.00    | 2.20    | 1.00   | 1.40       | 1.50  | 3.10  | 2.60   | 2.00    | 1.00    | 1.60    | 2.00    | 1.20    | 1.10     | 1.00    | 1.20      | 3.50       | 5.90   | 6.70       |
| Ko2                                                                                                                          | KG Apavár   | 2018 | 2.45                | 2.60                   | 7.15    | 3.70    | 1.55   | 2.20       | 1.45  | 3.15  | 2.80   | 4.00    | 1.70    | 2.00    | 3.00    | 2.90    | 0.90     | 2.00    | 1.00      | 6.70       | 7.85   | 9.10       |
| Ko3                                                                                                                          | KG Apavár   | 2018 | 5.50                | 8.50                   | 9.10    | 10.00   | 8.05   | 5.90       | 9.10  | 8.30  | 9.40   | 9.25    | 6.40    | 5.40    | 9.70    | 7.10    | 9.00     | 6.60    | 5.65      | 6.50       | 9.70   | 8.60       |

Table S1. *Cont.*

| Iso-<br>late                                                                                 | Cultivar     | Year | Barley differential |                        |         |         |        |            |       |       |        |         |         |         |         |         |          |         |           |            |        |            |
|----------------------------------------------------------------------------------------------|--------------|------|---------------------|------------------------|---------|---------|--------|------------|-------|-------|--------|---------|---------|---------|---------|---------|----------|---------|-----------|------------|--------|------------|
|                                                                                              |              |      | Beecher             | Canadian<br>Lake Shore | Corvett | Diamond | Harbin | Manchurian | Prior | Skiff | Tifang | C-20019 | CI 5791 | CI 4207 | CI 9819 | CI 9825 | CI 11458 | Sylphid | Sebastian | Harrington | Botond | MV Initium |
| Ko4                                                                                          | KWS          | 2018 | 4.75                | 7.10                   | 8.00    | 5.00    | 9.20   | 4.30       | 4.45  | 5.00  | 5.75   | 5.15    | 4.80    | 4.50    | 8.15    | 4.50    | 3.60     | 4.40    | 4.15      | 3.80       | 8.10   | 8.60       |
| Ko5                                                                                          | Faktor       | 2018 | 2.50                | 4.90                   | 1.30    | 4.80    | 4.15   | 2.30       | 4.85  | 5.00  | 2.70   | 3.15    | 2.40    | 3.10    | 6.20    | 3.30    | 1.90     | 4.40    | 2.00      | 4.00       | 8.65   | 7.50       |
| Ko6                                                                                          | Boreale      | 2018 | 5.50                | 4.40                   | 5.50    | 5.50    | 6.20   | 4.45       | 4.40  | 5.15  | 4.90   | 7.15    | 4.40    | 4.30    | 8.35    | 4.35    | 3.60     | 3.60    | 4.50      | 4.60       | 9.90   | 9.90       |
| Martonvásár, Central Transdanubia (Agricultural Institute, Centre for Agricultural Research) |              |      |                     |                        |         |         |        |            |       |       |        |         |         |         |         |         |          |         |           |            |        |            |
| M1                                                                                           | KH Turul     | 2008 | 4.45                | 0.60                   | 1.45    | 3.00    | 0.50   | 0.40       | 0.25  | 3.90  | 2.40   | 2.75    | 1.20    | 0.30    | 2.40    | 1.25    | 0.00     | 1.00    | 0.00      | 2.90       | 6.20   | 8.40       |
| M2                                                                                           | KH Center    | 2008 | 3.13                | 4.80                   | 3.50    | 2.00    | 6.69   | 2.20       | 1.43  | 2.14  | 2.40   | 2.50    | 2.00    | 2.00    | 3.14    | 1.14    | 1.30     | 3.00    | 1.00      | 2.40       | 7.60   | 7.40       |
| M3                                                                                           | KH Kárpátia  | 2018 | 5.20                | 9.00                   | 8.75    | 9.00    | 8.40   | 4.00       | 9.90  | 9.00  | 8.70   | 8.80    | 5.15    | 3.10    | 9.65    | 4.25    | 6.10     | 4.85    | 4.75      | 9.70       | 9.55   | 9.20       |
| M4                                                                                           | KG Konta     | 2018 | 2.10                | 1.45                   | 5.15    | 2.60    | 2.15   | 2.00       | 3.15  | 1.10  | 3.10   | 3.10    | 1.80    | 1.60    | 4.00    | 3.20    | 1.60     | 2.10    | 2.20      | 5.90       | 6.70   | 8.70       |
| M5                                                                                           | KH Zsombor   | 2018 | 4.00                | 4.50                   | 9.15    | 5.90    | 6.85   | 6.70       | 3.65  | 6.40  | 6.35   | 5.70    | 4.40    | 6.50    | 9.75    | 4.20    | 6.65     | 4.85    | 4.90      | 7.60       | 8.30   | 8.80       |
| M6                                                                                           | MV Initium   | 2018 | 4.90                | 7.00                   | 6.50    | 3.60    | 7.40   | 5.60       | 4.00  | 4.60  | 4.00   | 4.90    | 1.90    | 5.10    | 3.90    | 2.70    | 2.65     | 3.90    | 3.15      | 4.45       | 9.30   | 9.20       |
| M7                                                                                           | Faktor       | 2018 | 3.30                | 6.60                   | 5.00    | 3.25    | 6.30   | 4.30       | 2.10  | 5.90  | 3.30   | 3.65    | 3.20    | 3.10    | 3.30    | 2.70    | 3.00     | 3.70    | 4.40      | 4.30       | 9.30   | 8.70       |
| M8                                                                                           | KWS Meridian | 2018 | 3.70                | 5.75                   | 6.50    | 6.00    | 6.55   | 6.00       | 4.85  | 4.90  | 7.65   | 5.25    | 6.20    | 7.00    | 8.20    | 5.15    | 1.10     | 3.00    | 2.25      | 6.50       | 8.00   | 8.80       |
| M9                                                                                           | Siberia      | 2018 | 3.65                | 6.90                   | 4.00    | 3.90    | 6.30   | 4.30       | 2.45  | 7.45  | 4.15   | 4.00    | 2.90    | 4.15    | 4.35    | 2.55    | 4.30     | 5.00    | 5.90      | 4.10       | 8.25   | 9.20       |
| M10                                                                                          | GKH 30-15    | 2018 | 5.20                | 4.80                   | 6.00    | 4.50    | 4.65   | 4.90       | 3.55  | 8.45  | 4.00   | 4.55    | 3.45    | 3.80    | 4.65    | 3.65    | 4.00     | 5.30    | 4.15      | 5.00       | 9.60   | 8.70       |
| M11                                                                                          | Boreale      | 2018 | 2.50                | 5.00                   | 2.35    | 1.60    | 5.55   | 2.00       | 1.25  | 9.80  | 1.90   | 3.90    | 1.00    | 1.60    | 2.25    | 2.60    | 4.15     | 5.10    | 6.90      | 2.00       | 7.80   | 8.30       |
| M12                                                                                          | KH TAS       | 2018 | 3.15                | 5.50                   | 8.75    | 5.90    | 6.95   | 7.50       | 5.35  | 7.50  | 6.45   | 5.65    | 5.35    | 6.60    | 8.80    | 4.30    | 5.80     | 4.75    | 5.80      | 6.40       | 9.15   | 10.00      |
| Overall mean                                                                                 |              |      | 4.15                | 5.17                   | 5.57    | 4.73    | 5.65   | 3.90       | 4.47  | 5.35  | 4.67   | 5.15    | 3.57    | 3.78    | 5.82    | 3.60    | 3.54     | 3.86    | 3.82      | 5.19       | 8.40   | 8.76       |

<sup>1</sup> Bold numbers indicate virulence ( $\geq 5.00$ ) according to Tekauz [55].
